# Supplementary material for: A Cell Co-Culture Taste Sensor Using Different Proportions of Caco-2 and SH-SY5Y Cells for Bitterness Detection
Source: MDPI journal article supplement (doi:10.3390/chemosensors10050173), 2022-05-05
Supplement: s1 [file s1]

# A Cell Co-Culture Taste Sensor Using Different Proportions of Caco-2 and SH-SY5Y Cells for Bitterness Detection

Chunlian Qin <sup>1,2,3,†</sup>, Saisai Zhang <sup>4,†</sup>, Qunchen Yuan <sup>1,2</sup>, Mengxue Liu <sup>1,3</sup>, Nan Jiang <sup>1,2</sup>,  
Liuqing Zhuang <sup>1,3</sup>, Liquan Huang <sup>4,\*</sup> and Ping Wang <sup>1,2,3,\*</sup>

<sup>1</sup> Biosensor National Special Laboratory, Key Laboratory for Biomedical Engineering of Education Ministry, Department of Biomedical Engineering, Zhejiang University, Hangzhou 310027, China;  
lotusqin@zju.edu.cn (C.Q.); sumyuan@zju.edu.cn (Q.Y.); liumx15015@zju.edu.cn (M.L.); 21915031@zju.edu.cn (N.J.); thisiszlj@163.com (L.Z.)

<sup>2</sup> State Key Laboratory of Transducer Technology, Chinese Academy of Sciences, Shanghai 200050, China

<sup>3</sup> Cancer Center, Binjiang Institute of Zhejiang University, Hangzhou 310053, China

<sup>4</sup> College of Life Sciences, Zhejiang University, Hangzhou 310058, China;  
saisai.zhang@zju.edu.cn (S.Z.)

\* Correspondence: huangliquan@zju.edu.cn (L.H.); cnpwang@zju.edu.cn (P.W.)

† These authors contributed equally to this work.

## Methods:

### 1. Image J cell counting

To qualify the ratio of two types of cells, cell counting was performed using ImageJ software for each single-color fluorescence image. The operation steps are as follows, in short:

- 1) Open the image to be counted, and convert it to greyscale before proceeding (Image -> Type->8 bit);
- 2) Inverted image (Edit->Invert);
- 3) To highlight all of the structures you want to count(Image->Adjust-> Threshold); Process->Subtract background with the rolling ball may help if highlighting too many "noise" or background pixels;
- 4) Fill in the gaps in the nucleus (Process->Binary->Fill Holes);
- 5) If particles merged together, cut them apart by adding a 1-pixel thick line (Process->Binary->Watershed);
- 6) Automatic cell counting(Analyze->Analyze Particles).

### 2. Quantitative reverse transcription-PCR analysis

Total RNA was extracted from Caco-2 cells and SH-SY5Y cells using TaKaRa MiniBEST Universal RNA Extraction Kit (9767), and reverse transcribed with 1 µg RNA using PrimeScript™ 1st Strand cDNA Synthesis Kit (TaKaRa, 6110A) according to the manufacturer's instructions. Real-time PCR was set up using the iQ™ SYBR Green Supermix (Bio-rad, 170-8884), and carried out with the CFX Connect™ Real-Time System. Specific primers were obtained from Sangon Biotech. An endogenous "housekeeping" control gene  $\beta$ -actin was used in the quantification of relative expression levels of targeted genes.

Figure S1:

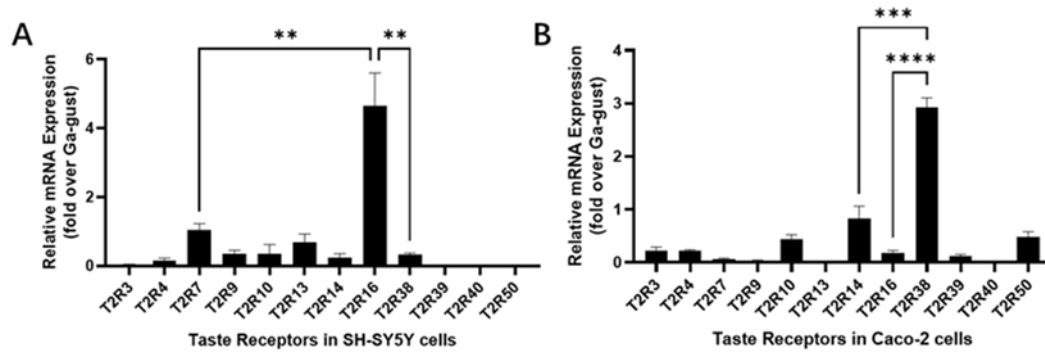

Figure S1 Taste receptors relative mRNA expression in (A) SH-SY5Y cells and (B) Caco-2 cells (n = 3). One-way ANOVA with Tukey's posthoc test, \*\*\*\*  $p \leq 0.0001$ , \*\*\*  $p < 0.001$ ; \*\*  $p < 0.01$ .
